# Supplementary material
Source: Springer Nature journal article supplement (https://www.springermedizin.de/resource/supplementary/13063_2009_387_MOESM2_ESM.pdf/9618120)
Supplement: MOESM2 [file 9618120]

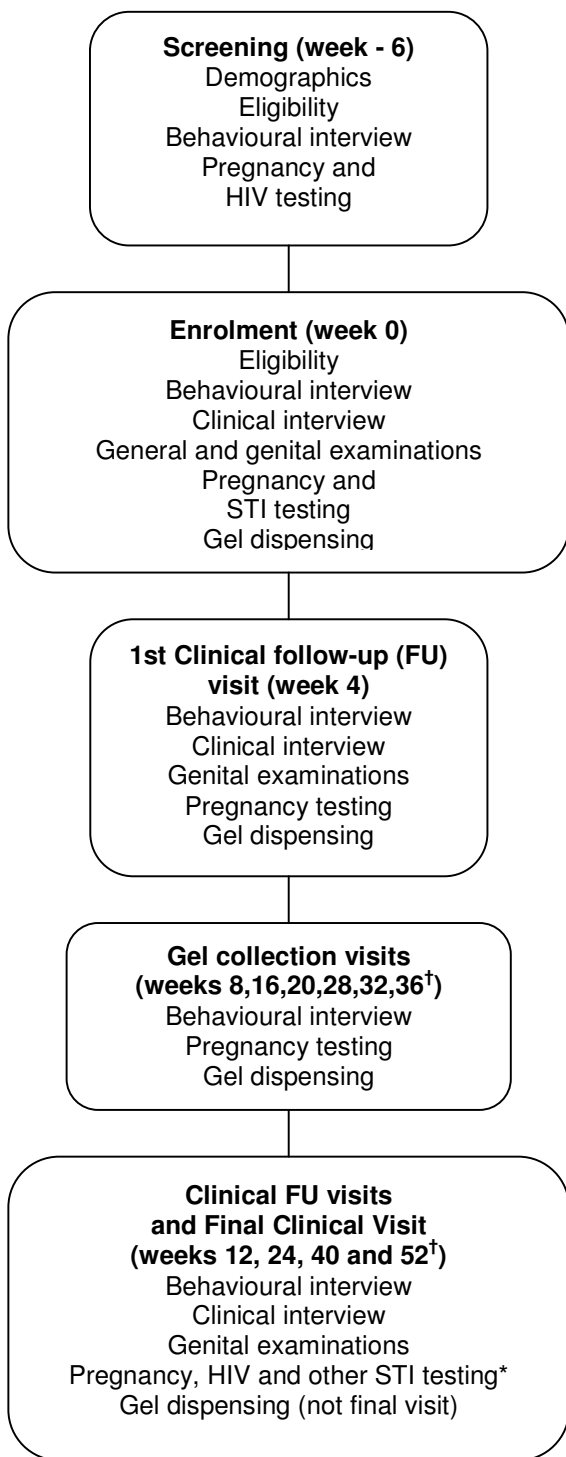

<sup>†</sup>Visits continue for up to a maximum of 104 weeks for Masaka participants; \* HIV testing at weeks -6, 12, 24, 40, 52; HSV2 testing at weeks 0, 40, 52; Other STI testing at weeks 0, 24
